# Supplementary material for: Erratum to: A benchmark for RNA-seq quantification pipelines
Source: PubMed Central journal article supplement (PMC5045616; doi:10.1186/s13059-016-1060-7), 2016-09-30

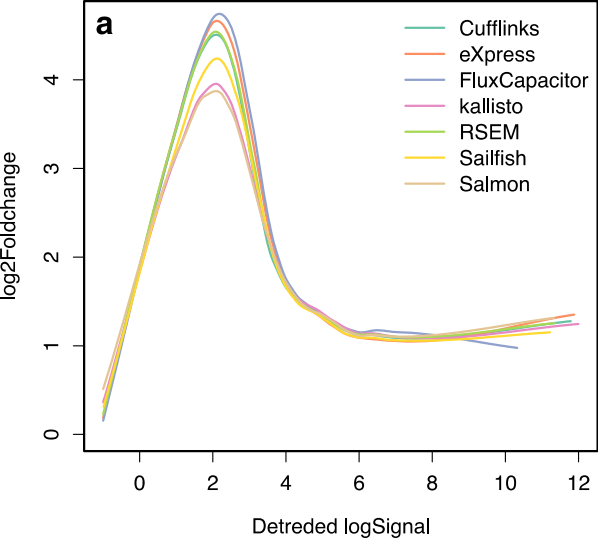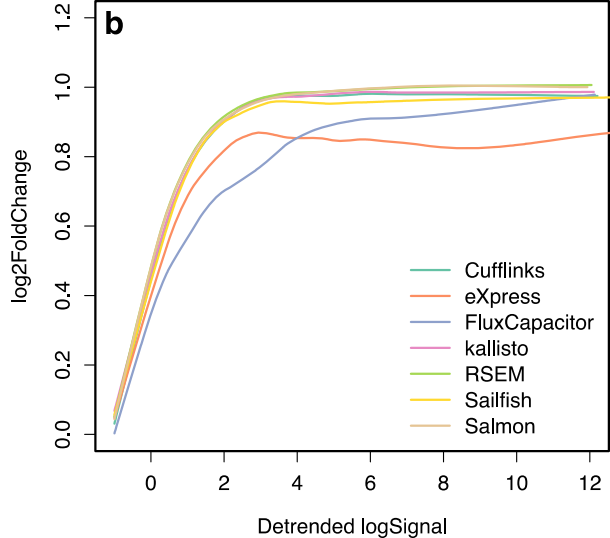

Supplement: 13059_2016_1060_MOESM1_ESM.pdf [file 13059_2016_1060_MOESM1_ESM.pdf]
